# Supplementary material
Source: Springer Nature journal article supplement (https://www.springermedizin.de/resource/supplementary/40478_2014_108_MOESM1_ESM.pdf/25658178)
Supplement: MOESM1 [file 25658178]

## **Additional File**

### **Supplemental Figures 1-3**

#### **Comparative analysis of single and combined APP/APLP knockouts reveals reduced spine density in APP-KO mice that is prevented by APP $\alpha$ expression**

Sascha W. Weyer<sup>1</sup>, Marta Zagrebelsky<sup>3</sup>, Ulrike Herrmann<sup>3</sup>, Meike Hick<sup>1</sup>, Lennard Ganss<sup>2</sup>, Julia Gobbert<sup>1</sup>, Morna Gruber<sup>4</sup>, Christine Altmann<sup>4</sup>, Martin Korte<sup>3</sup>, Thomas Deller<sup>4</sup>, Ulrike C. Müller<sup>1</sup>

<sup>1</sup> Ruprecht-Karls University Heidelberg, Institute of Pharmacy and Molecular Biotechnology, Bioinformatics and Functional Genomics, Im Neuenheimer Feld 364, D-69120 Heidelberg, Germany

<sup>2</sup> Ruprecht-Karls University Heidelberg, Department of Applied Tumor Biology, Institute of Pathology, University of Heidelberg, and Clinical Cooperation Unit Applied Tumor Biology, German Cancer Research Center (DKFZ), D-69120 Heidelberg, Germany

<sup>3</sup> TU Braunschweig, Zoological Institute, Cellular Neurobiology, Spielmannstr. 7, D-38106 Braunschweig, Germany

<sup>4</sup> Goethe University Frankfurt, Institute of Clinical Neuroanatomy, Neuroscience Center, Theodor-Stern-Kai 7, D-60590 Frankfurt/Main

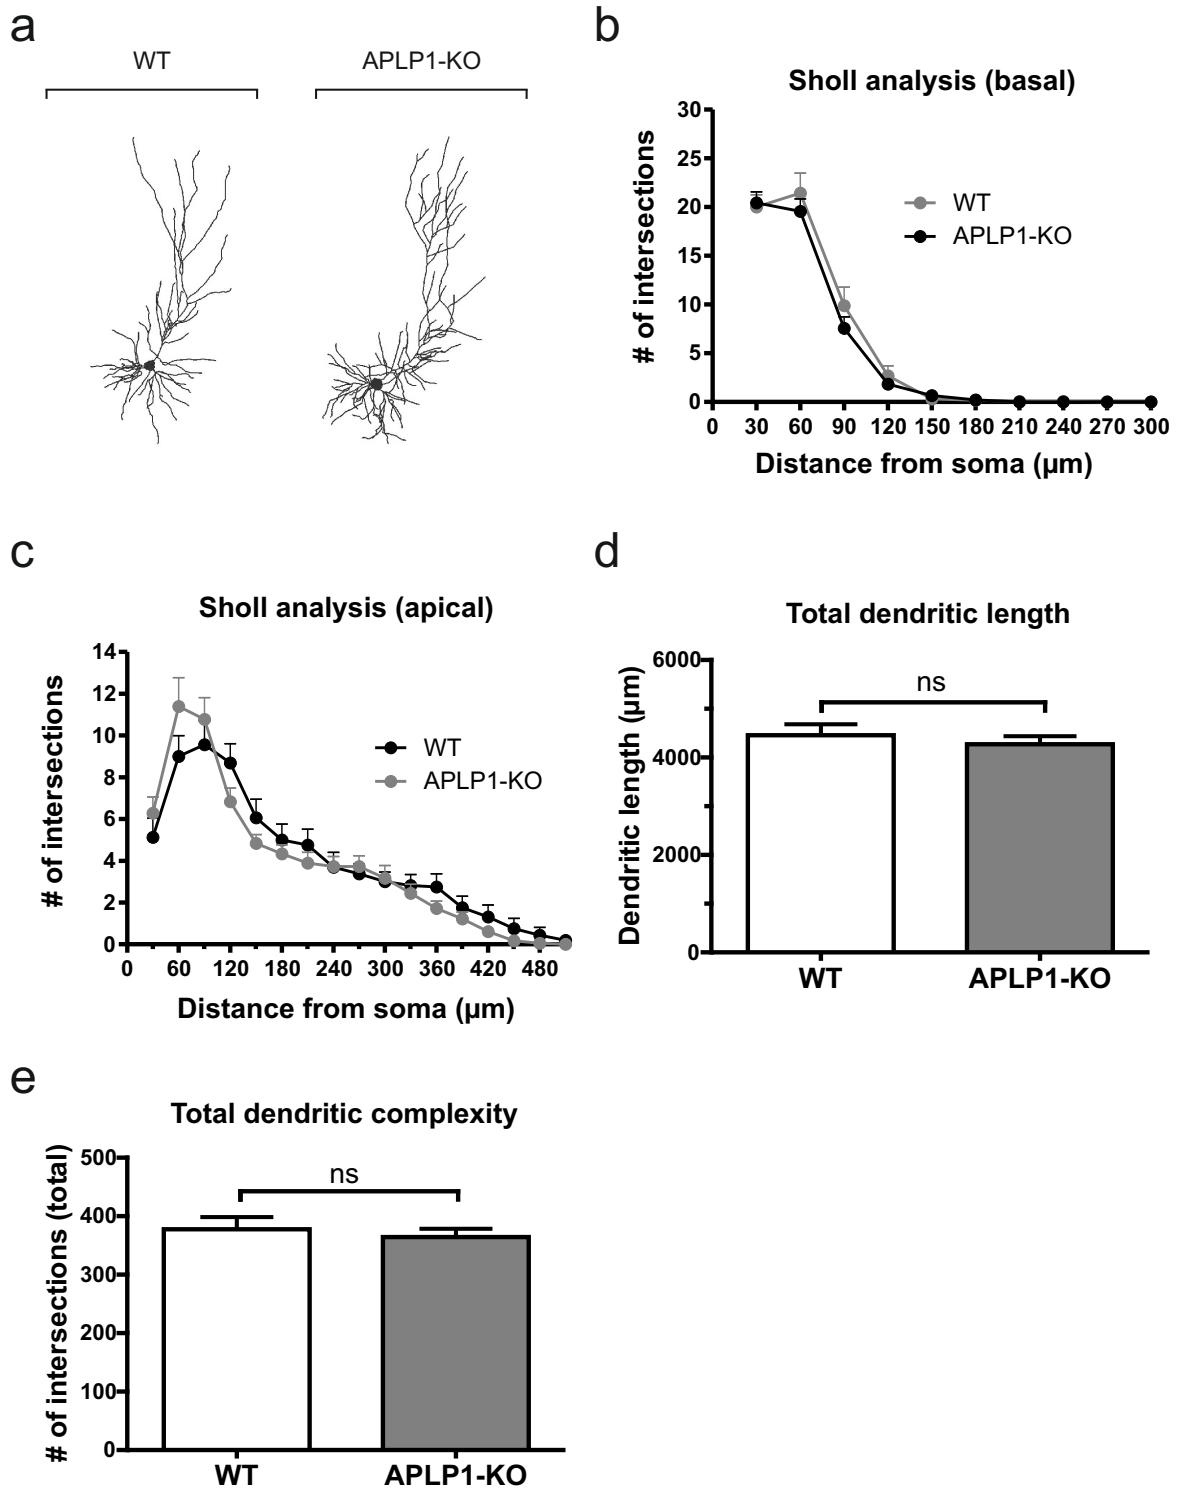

Suppl. Fig. 1

**Suppl. Fig. 1: APLP1-KO does not lead to alterations in dendritic morphology.**

(a) Representative examples of 3D-reconstructed hippocampal CA1 pyramidal neurons from WT and APLP1-KO OHCs. (b, c) Sholl analysis comparing basal (b) and apical (c) dendrites

between WT and APLP1-KO neurons revealed an unaltered branching pattern (Repeated measure ANOVA with Bonferroni multiple comparison test, n.s.). (d) Total dendritic length and (e) total dendritic complexity of APLP1-KO CA1 neurons was not significantly different from WT neurons (Student's t test, n.s.). WT: n = 22 neurons/ 5 mice, APLP1-KO: n = 27 neurons/ 6 mice). Values represent mean  $\pm$  SEM.

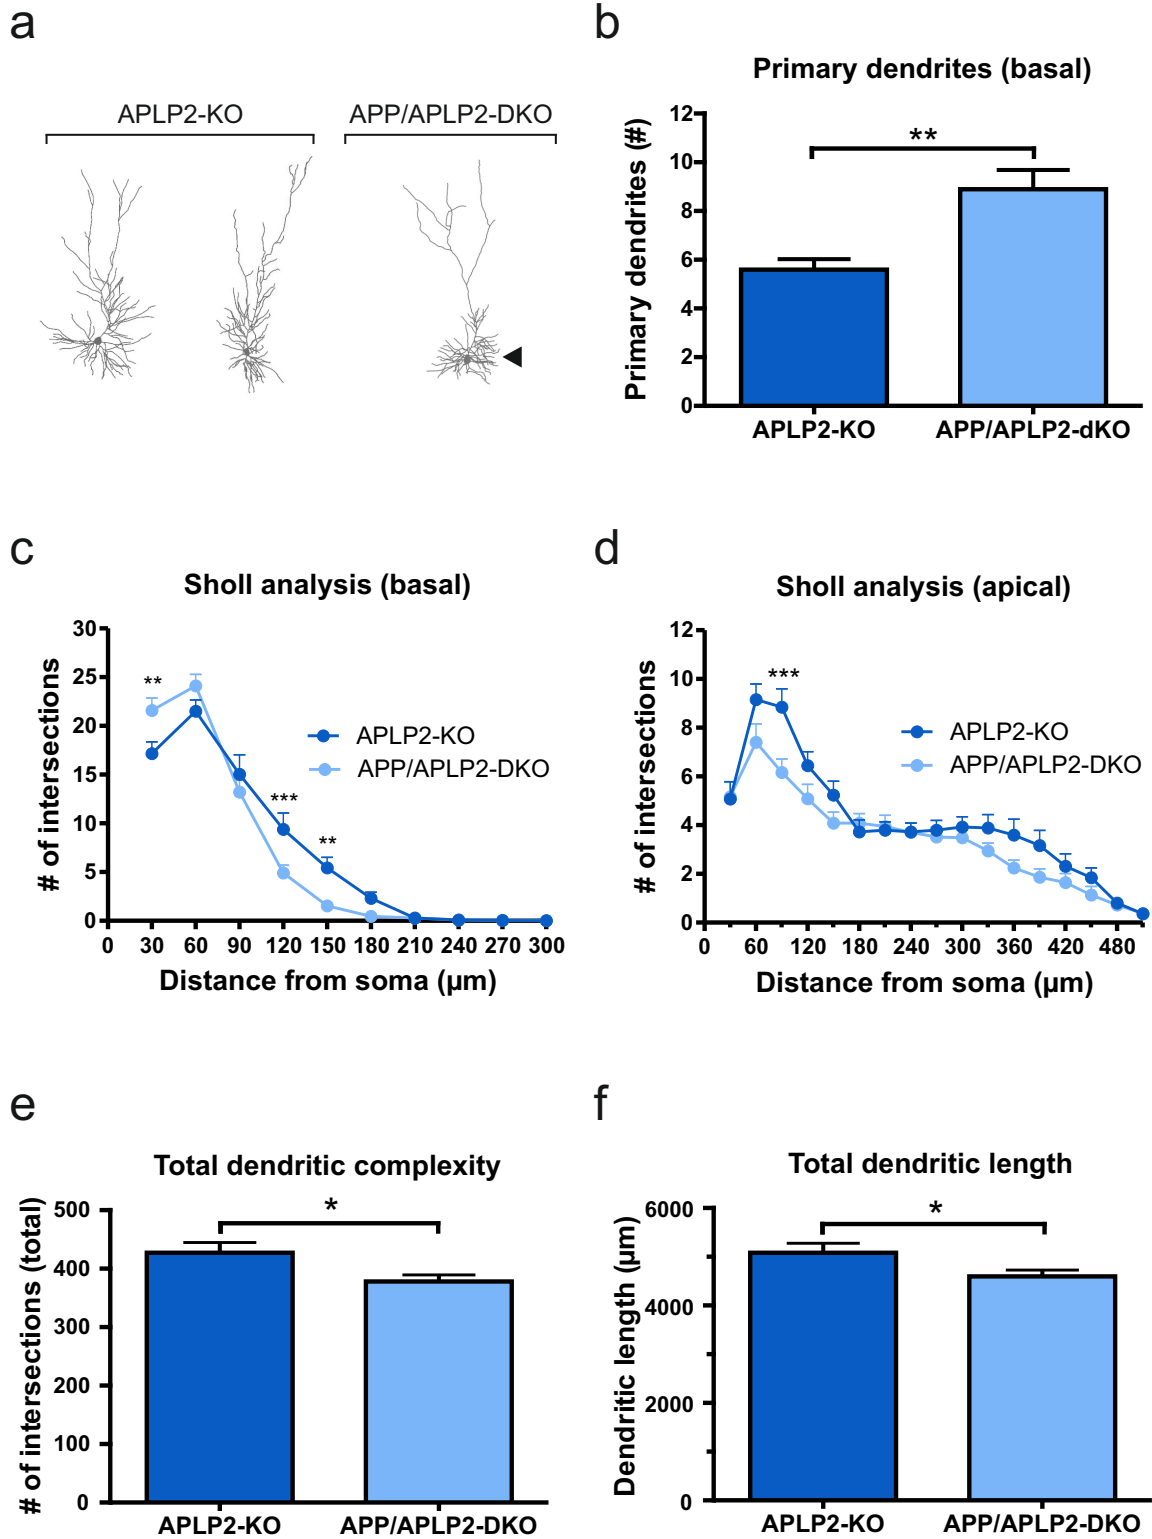

Suppl. Fig. 2

Suppl. Fig. 2: Pyramidal cells from combined APP/APLP2-DKO neurons show additional defects in dendritic complexity compared to APLP2-KO single mutants.

**(a)** Representative example of 3D-reconstructed CA1 neurons from APLP2-KO (left) and APP/APLP2-DKO mice (right). Arrowhead indicates an increase in the number of primary basal dendrites in APP/APLP2-DKO neurons. **(b)** Comparison of the number of primary basal dendrites revealed a striking increase in APP/APLP2-DKO neurons when compared to neurons from APLP2-KO littermate controls (Student's t-test,  $**p \leq 0.01$ ). **(c)** Basal dendrites from APP/APLP2-DKO mice are characterized by an increase in complexity close to the soma (30  $\mu\text{m}$ ) and a decrease in distal aspects of basal dendrites (Repeated measure ANOVA with Bonferroni multiple comparison test:  $**p \leq 0.01$  for 30  $\mu\text{m}$  and 150  $\mu\text{m}$ ,  $***p \leq 0.001$  for 120 $\mu\text{m}$ ). **(d)** Sholl analysis of apical dendrites shows considerably decreased dendritic branching in proximal dendritic regions from APP/APLP2-DKO neurons compared to APLP2-KO neurons (Repeated measure ANOVA with Bonferroni multiple comparison test:  $***p \leq 0.001$  for 90  $\mu\text{m}$ ). Note that a similar reduction in dendritic complexity of double mutants was also seen in comparison to APP-KO single mutants (see Fig. 3). In mid-distal regions (330–390  $\mu\text{m}$ ), branching was reduced in APP/APLP2-DKO compared to APLP2-KO neurons, but failed to reach significance. APP/APLP2-DKO data in c, d same as in Fig. 3. **(e, f)** Alterations in neuronal morphology of APP/APLP2-DKO neurons resulted in a significant reduction in **(e)** the total dendritic complexity and **(f)** total dendritic length as compared to APLP2-KO littermate controls (Student's t-test,  $*p \leq 0.05$ ). APLP2-KO: n = 25 neurons/ 5 mice, APP-DKO: n = 37 neurons/ 6 mice. All values represent mean  $\pm$  SEM.

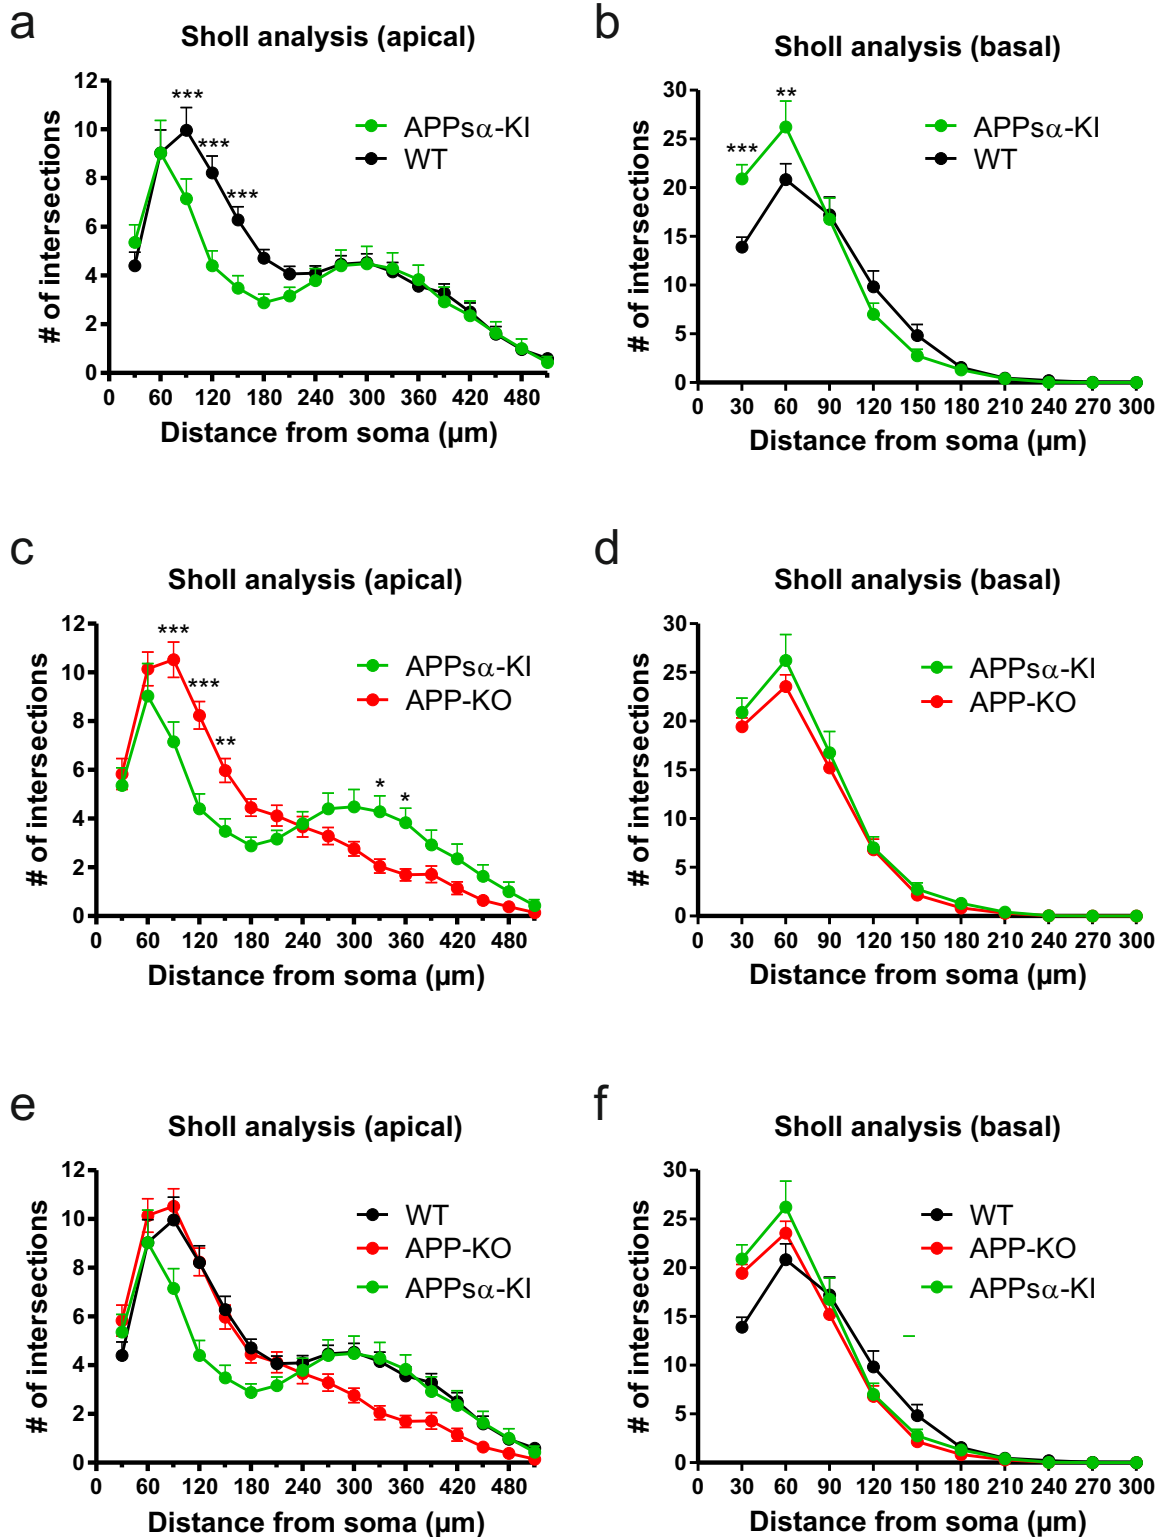

Suppl. Fig. 3

Suppl. Fig. 3: Sholl analysis of APPs $\alpha$ -KI neurons indicates a rescue in dendritic arborization restricted to distal segments of apical dendrites

**(a)** Compared to WT CA1 neurons apical dendrites of APPs $\alpha$ -KI neurons did not show the pronounced reduction of apical dendritic branching (at a distance of 300, 330, 360  $\mu$  from the soma) observed in APP-KO neurons (see Fig 2). At this distance from the soma Sholl graphs of WT and APPs $\alpha$ -KI neurons were indistinguishable (see also **e**), underscoring the fact that APPs $\alpha$  can rescue this *distal* dendritic phenotype. However, the role of APPs $\alpha$  for dendritic morphology appears more complex and dendritic branching was decreased in proximal apical dendrites. (Repeated measure ANOVA with Bonferroni's multiple comparison test: \*\*\* $p \leq 0.001$  for 120, 150 and 180 $\mu$ m). **(b)** Basal dendrites of APPs $\alpha$ -KI CA1 neurons revealed, similar to APP-KO neurons (see also **e**), an increase in the number of intersections close to the soma in (Repeated measure ANOVA with Bonferroni's multiple comparison test: \*\*\* $p \leq 0.001$  for 30 $\mu$ m; \*\* $p \leq 0.01$  for 60 $\mu$ m). **(c)** When compared to APP-KO neurons, APPs $\alpha$ -KI CA1 neurons show increased dendritic branching in distal segments of apical dendrites (Repeated measure ANOVA with Bonferroni's multiple comparison test: \* $p \leq 0.05$  for 330 and 360 $\mu$ m). Reduced dendritic branching was observed in proximal segments of apical dendrites (Repeated measure ANOVA with Bonferroni's multiple comparison test: \*\*\* $p \leq 0.001$  for 120, 150 $\mu$ m, \*\* $p \leq 0.01$  for 180 $\mu$ m). **(d)** Branching pattern of basal dendrites showed no significant difference between APP-KO and APPs $\alpha$ -KI neurons. **(e, f)** Graphical superposition of Sholl graphs for WT, APP-KO and APPs $\alpha$ -KI neurons. Statistics were performed for two-group comparisons, as indicated above. **(a-c)** WT: n = 32 neurons/ 6 mice, APP-KO: n = 42 neurons/ 7 mice. APPs $\alpha$ -KI: n = 25 neurons/ 5 mice. All values represent mean  $\pm$  SEM.
